# Supplementary material for: The Potential Impact of Inducing a Restriction in Reimbursement Criteria on Vitamin D Supplementation in Osteoporotic Patients with or without Fractures
Source: MDPI journal article supplement (doi:10.3390/nu14091877), 2022-04-29
Supplement: s1 [file s1]

Supplementary Material Box 1. Note 96 as outlined in the Italian Drugs Agency (AIFA) website;  
<https://www.aifa.gov.it/Nota-96>

The prescription by the NHS of drugs with the indication "**prevention and treatment of vitamin D\* deficiency**" in adults (>18 years) is limited to the following conditions:

Prevention and treatment of vitamin D deficiency in the following clinical scenarios:

*regardless of measurement of 25(OH)D levels*

- institutionalized people
- pregnant or lactating women
- people with osteoporosis of any cause or known osteopathies not candidates for remineralizing therapy

*after measuring 25(OH)D levels*

- people with serum levels of 25OHD <20 ng/mL and symptoms attributable to hypovitaminosis (asthenia, myalgia, widespread or localized pain, frequent unexplained falls)
- people diagnosed with hyperparathyroidism secondary to hypovitaminosis D
- people with osteoporosis of any cause or known bone disorders candidates for remineralizing therapy for which the

*correction of hypovitaminosis should be a prerequisite for the start of therapy \*\**

- a long-term therapy with drugs that interfere with vitamin D metabolism
- diseases that can cause malabsorption in adults

Table S1. Definition of baseline characteristics. \* Vitamin D drugs included in this note from AIFA include cholecalciferol, cholecalciferol/calcium salt and calcifediol ; \*\* Remineralizing therapies should be started after correction of hypovitaminosis D.

| Characteristics    | Definition                                                                                                                                                                                                                                                |
|--------------------|-----------------------------------------------------------------------------------------------------------------------------------------------------------------------------------------------------------------------------------------------------------|
| <i>Comorbidity</i> |                                                                                                                                                                                                                                                           |
| Hypertension       | at least 1 hospitalization with a discharge diagnosis for Hypertensive Disease (ICD-9-CM codes: 401-405) or at least 2 prescriptions of antihypertensive drugs (ATC codes: C03; C07; C08; C09) or presence of exemption for hypertension (code 031; A31); |
| Diabetes           | at least 1 hospitalization with a discharge diagnosis for diabetes (ICD-9-CM code: 250) or at least 3 prescriptions                                                                                                                                       |

|                                                             |                                                                                                                                                                                                                                                                                                      |
|-------------------------------------------------------------|------------------------------------------------------------------------------------------------------------------------------------------------------------------------------------------------------------------------------------------------------------------------------------------------------|
|                                                             | of antidiabetic drugs (ATC code: A10) or presence of exemption for diabetes (code 013);                                                                                                                                                                                                              |
| Rheumatoid Arthritis                                        | at least 1 hospitalization with a discharge diagnosis for rheumatoid arthritis and other inflammatory polyarthropathies (ICD-9-CM code: 714) or presence of exemption for rheumatoid arthritis (code: 006);                                                                                          |
| Dyslipidemia                                                | at least 1 hospitalization with a discharge diagnosis for disorders of lipid metabolism (ICD-9-CM code: 272) or at least 3 prescriptions of lipid modifying agents (ATC code: C10) or presence of exemption for hypercholesterolemia (code: 025);                                                    |
| Ischemic heart disease                                      | at least 1 hospitalization with a discharge diagnosis for Acute myocardial infarction or Ischemic heart disease (ICD-9-CM codes: 410-414) or presence of exemption for ischemic heart disease (code: A02.414)                                                                                        |
| Cardiac dysrhythmias                                        | at least 1 hospitalization with a discharge diagnosis for cardiac dysrhythmias (ICD-9-CM code: 427) or at least 2 prescriptions of antiarrhythmics agents (ATC code: C01B) or presence of exemption for cardiac dysrhythmias (code: A02.427)                                                         |
| Heart failure                                               | at least 1 hospitalization with a discharge diagnosis for Heart failure (ICD-9-CM code: 428)                                                                                                                                                                                                         |
| Stroke                                                      | at least 1 hospitalization with a discharge diagnosis for Cerebrovascular Disease (ICD-9-CM code: 430-438) or presence of exemption for neurovascular disease (codes: B02.433; B02.434; B02.437)                                                                                                     |
| Dementia                                                    | at least 1 hospitalization with a discharge diagnosis for dementias (ICD-9-CM code: 290) or senility without mention of psychosis (icd-9-cm 797) or presence of exemption for dementias (code 011)                                                                                                   |
| Schizophrenic disorders                                     | at least 1 hospitalization with a discharge diagnosis for Schizophrenic disorders (ICD-9-CM codes: 295-299)                                                                                                                                                                                          |
| Chronic Obstructive Pulmonary Disease and Allied Conditions | at least 1 hospitalization with a discharge diagnosis for Chronic Obstructive Pulmonary Disease and Allied Conditions (ICD-9-CM codes: 490-496) or presence of at least 2 prescriptions of drugs for obstructive airway diseases (ATC code: R03) or presence of exemption for asthma (code: 007.493) |
| <i>Co-treatments</i>                                        |                                                                                                                                                                                                                                                                                                      |
| Corticosteroids for systemic use                            | at least 2 prescriptions of corticosteroids for systemic use (ATC code: H02)                                                                                                                                                                                                                         |

|                                                               |                                                                                                                    |
|---------------------------------------------------------------|--------------------------------------------------------------------------------------------------------------------|
| Platelet aggregation inhibitors excl. heparin                 | at least 2 prescriptions of Platelet aggregation inhibitors excl. heparin (ATC code: B01AC)                        |
| Vitamin K antagonists/Direct thrombin or factor Xa inhibitors | at least 2 prescriptions of Vitamin K antagonists or Direct factor Xa inhibitors (ATC codes: B01AA; B01AE; B01AF); |
| Analgesics                                                    | at least 2 prescriptions of analgesic agents (ATC code: N02)                                                       |
| Antiepileptics                                                | at least 2 prescriptions of antiepileptic agents (ATC code: N03)                                                   |
| Antipsychotics/anxiolytics                                    | at least 2 prescriptions of antipsychotic or anxiolytics agents (ATC codes: N05A; N05B)                            |
| Proton pump inhibitors                                        | at least 2 prescriptions of proton pump inhibitors (ATC code: A02BA).                                              |

Supplementary Table S2. Baseline characteristics of patients in Period 3bis vs Period 3.

| Characteristics                       | Cohort<br>Period 3bis<br>(N=46,813) | Cohort<br>Period 3<br>(N=36,813) | p-value |
|---------------------------------------|-------------------------------------|----------------------------------|---------|
| Age, years (mean±SD)                  | 68.8±9.0                            | 68.7±8.9                         | 0.125   |
| Female, n (%)                         | 44,584 (95.2)                       | 35,016 (95.1)                    | 0.421   |
| <i>Comorbidities, n (%)</i>           |                                     |                                  |         |
| Hypertension                          | 27,475 (58.7)                       | 21,705 (59.0)                    | 0.432   |
| Diabetes                              | 5,337 (11.4)                        | 4,302 (11.7)                     | 0.199   |
| Rheumatoid Arthritis                  | 818 (1.7)                           | 680 (1.8)                        | 0.280   |
| Dyslipidemia                          | 13,824 (29.5)                       | 10,962 (29.8)                    | 0.437   |
| Ischemic heart disease                | 290 (0.6)                           | 254 (0.7)                        | 0.208   |
| Cardiac dysrhythmias                  | 1,625 (3.5)                         | 1,313 (3.6)                      | 0.457   |
| Heart failure                         | 115 (0.2)                           | 89 (0.2)                         | 0.910   |
| Stroke                                | 362 (0.8)                           | 304 (0.8)                        | 0.396   |
| Dementia                              | 26 (0.1)                            | 20 (0.1)                         | 0.941   |
| Schizophrenic disorders               | 111 (0.2)                           | 87 (0.2)                         | 0.982   |
| Chronic Obstructive Pulmonary Disease | 6,075 (13.0)                        | 4,915 (13.4)                     | 0.112   |
| <i>Co-treatments, n (%)</i>           |                                     |                                  |         |
| Corticosteroids for systemic use      | 7,274 (15.5)                        | 5,875 (16.0)                     | 0.097   |

|                                               |               |               |       |
|-----------------------------------------------|---------------|---------------|-------|
| Platelet aggregation inhibitors excl. Heparin | 11,135 (23.8) | 8,766 (23.8)  | 0.930 |
| VKA / Direct factor Xa inhibitors             | 1,219 (2.6)   | 974 (2.6)     | 0.707 |
| Analgesics                                    | 3,791 (8.1)   | 3,017 (8.2)   | 0.610 |
| Antiepileptics                                | 2,730 (5.8)   | 2,206 (6.0)   | 0.328 |
| Antipsychotics                                | 559 (1.2)     | 447 (1.2)     | 0.791 |
| Proton pump inhibitors                        | 21,709 (46.4) | 17,284 (47.0) | 0.097 |

Supplementary Table S3. Baseline characteristics of patients in Period 2bis vs Period 2.

| Characteristics                               | Cohort<br>Period 2bis<br>(N=44,577) | Cohort<br>Period 2<br>(N=45,736) | p-value |
|-----------------------------------------------|-------------------------------------|----------------------------------|---------|
| Age, years (mean±SD)                          | 69.0±9.0                            | 68.8±9.5                         | <0.05   |
| Female, n (%)                                 | 42,475 (95.3)                       | 43,453 (95.0)                    | 0.053   |
| <i>Comorbidities, n (%)</i>                   |                                     |                                  |         |
| Hypertension                                  | 26,515 (59.5)                       | 27,109 (59.3)                    | 0.523   |
| Diabetes                                      | 5,099 (11.4)                        | 5,246 (11.5)                     | 0.882   |
| Rheumatoid Arthritis                          | 810 (1.8)                           | 803 (1.8)                        | 0.486   |
| Dyslipidemia                                  | 13,263 (29.8)                       | 13,528 (29.6)                    | 0.566   |
| Ischemic heart disease                        | 276 (0.6)                           | 301 (0.7)                        | 0.462   |
| Cardiac dysrhythmias                          | 1,602 (3.6)                         | 1,600 (3.5)                      | 0.438   |
| Heart failure                                 | 113 (0.3)                           | 104 (0.2)                        | 0.423   |
| Stroke                                        | 355 (0.8)                           | 326 (0.7)                        | 0.147   |
| Dementia                                      | 26 (0.1)                            | 27 (0.1)                         | 0.965   |
| Schizophrenic disorders                       | 96 (0.2)                            | 104 (0.2)                        | 0.700   |
| Chronic Obstructive Pulmonary Disease         | 5,830 (13.1)                        | 5,970 (13.1)                     | 0.910   |
| <i>Co-treatments, n (%)</i>                   |                                     |                                  |         |
| Corticosteroids for systemic use              | 6,983 (15.7)                        | 7,073 (15.5)                     | 0.407   |
| Platelet aggregation inhibitors excl. Heparin | 10,771 (24.2)                       | 10,888 (23.8)                    | 0.210   |

|                                   |               |               |       |
|-----------------------------------|---------------|---------------|-------|
| VKA / Direct factor Xa inhibitors | 1,192 (2.7)   | 1,207 (2.6)   | 0.744 |
| Analgesics                        | 3,668 (8.2)   | 3,642 (8.0)   | 0.144 |
| Antiepileptics                    | 2,569 (5.8)   | 2,603 (5.7)   | 0.643 |
| Antipsychotics                    | 526 (1.2)     | 522 (1.1)     | 0.588 |
| Proton pump inhibitors            | 20,932 (47.0) | 21,326 (46.6) | 0.323 |

Supplementary Table S4. Baseline demographic characteristics, comorbidity profile and co-treatments of VD users during 1 July- 31 October 2018.

| Characteristics                               | VD users during<br>1 July- 31 October<br>2018 (N=44,577) |
|-----------------------------------------------|----------------------------------------------------------|
| Age, years (mean±sd)                          | 69.0±9.0                                                 |
| Female, n (%)                                 | 42,475 (95.3)                                            |
| <i>Comorbidities, n (%)</i>                   |                                                          |
| Hypertension                                  | 26,515 (59.5)                                            |
| Diabetes                                      | 5,099 (11.4)                                             |
| Rheumatoid Arthritis                          | 810 (1.8)                                                |
| Dyslipidemia                                  | 13,263 (29.8)                                            |
| Ischemic heart disease                        | 276 (0.6)                                                |
| Cardiac dysrhythmias                          | 1,602 (3.6)                                              |
| Heart failure                                 | 113 (0.3)                                                |
| Stroke                                        | 355 (0.8)                                                |
| Dementia                                      | 26 (0.1)                                                 |
| Schizophrenic disorders                       | 96 (0.2)                                                 |
| Chronic Obstructive Pulmonary Disease         | 5,830 (13.1)                                             |
| <i>Co-treatments, n (%)</i>                   |                                                          |
| Corticosteroids for systemic use              | 6,983 (15.7)                                             |
| Platelet aggregation inhibitors excl. Heparin | 10,771 (24.2)                                            |
| VKA/direct factor Xa inhibitors               | 1,192 (2.7)                                              |
| Analgesics                                    | 3,668 (8.2)                                              |

|                        |               |
|------------------------|---------------|
| Antiepileptics         | 2,569 (5.8)   |
| Antipsychotics         | 526 (1.2)     |
| Proton pump inhibitors | 20,932 (47.0) |

---
